# Supplementary material
Source: PubMed Central journal article supplement (PMC2174610)

# Supplemental figure 1

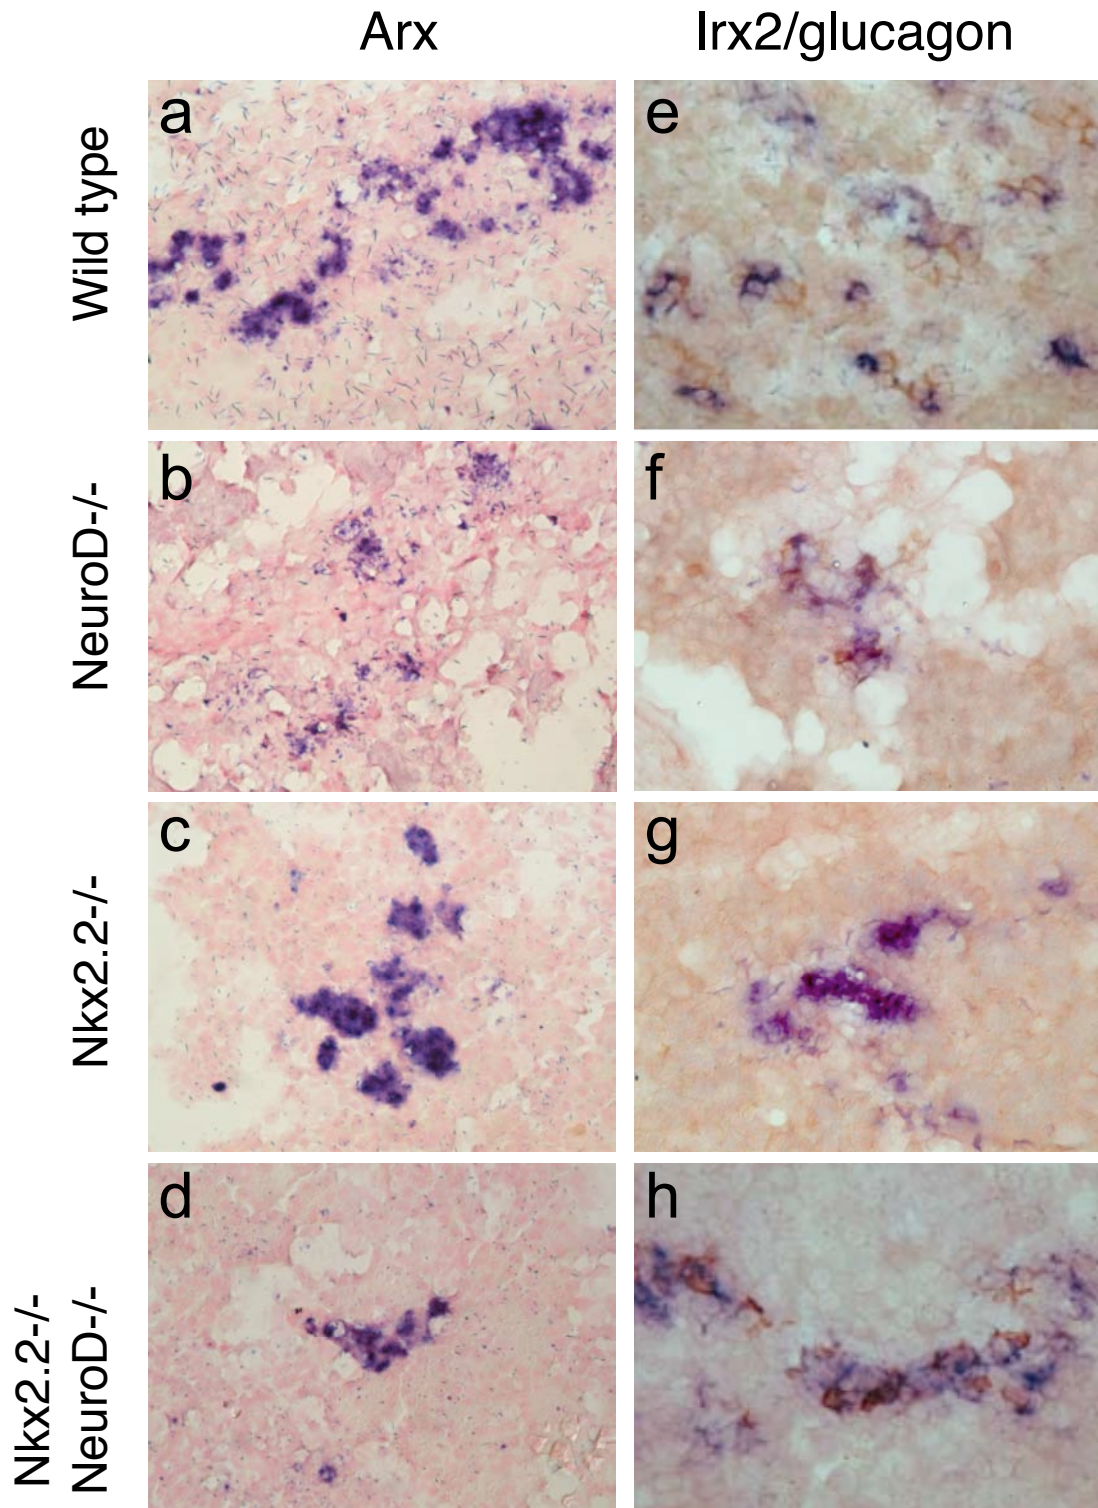

Supplement: NIHMS36072-supplement-01.pdf [file NIHMS36072-supplement-01.pdf]

Supplemental figure 2

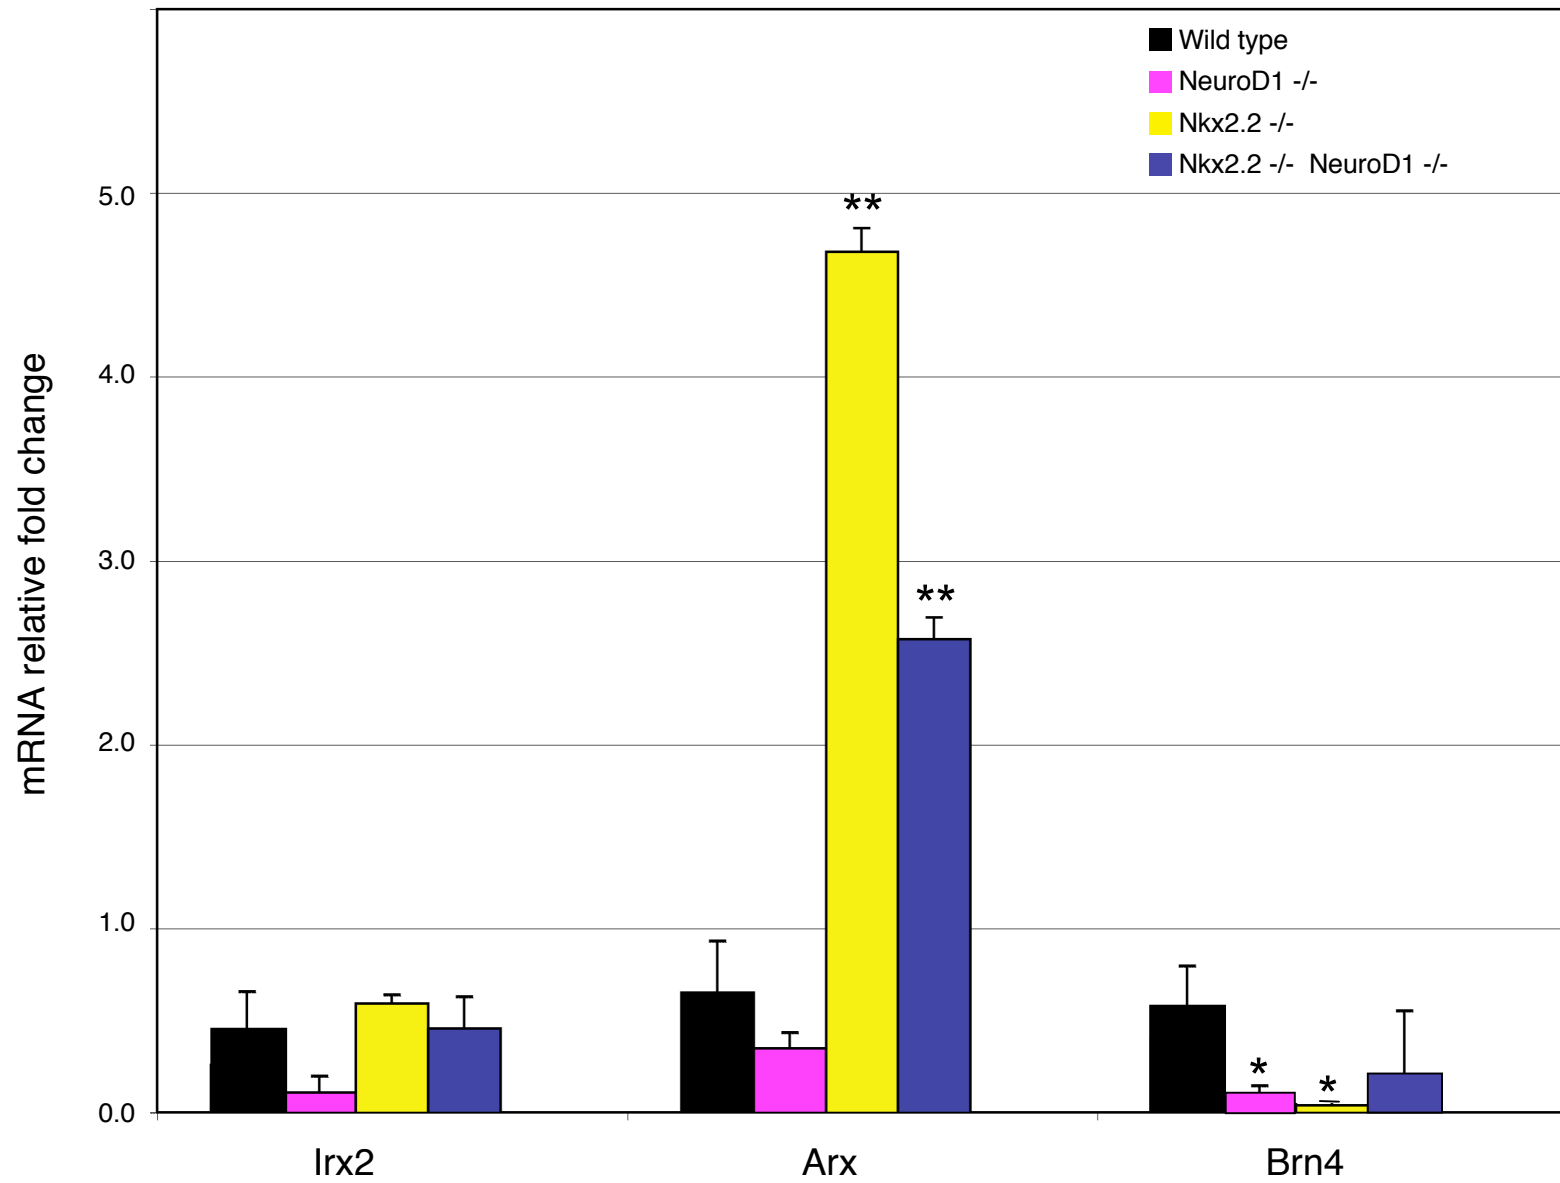

Supplement: NIHMS36072-supplement-02.pdf [file NIHMS36072-supplement-02.pdf]

Supplemental figure 3

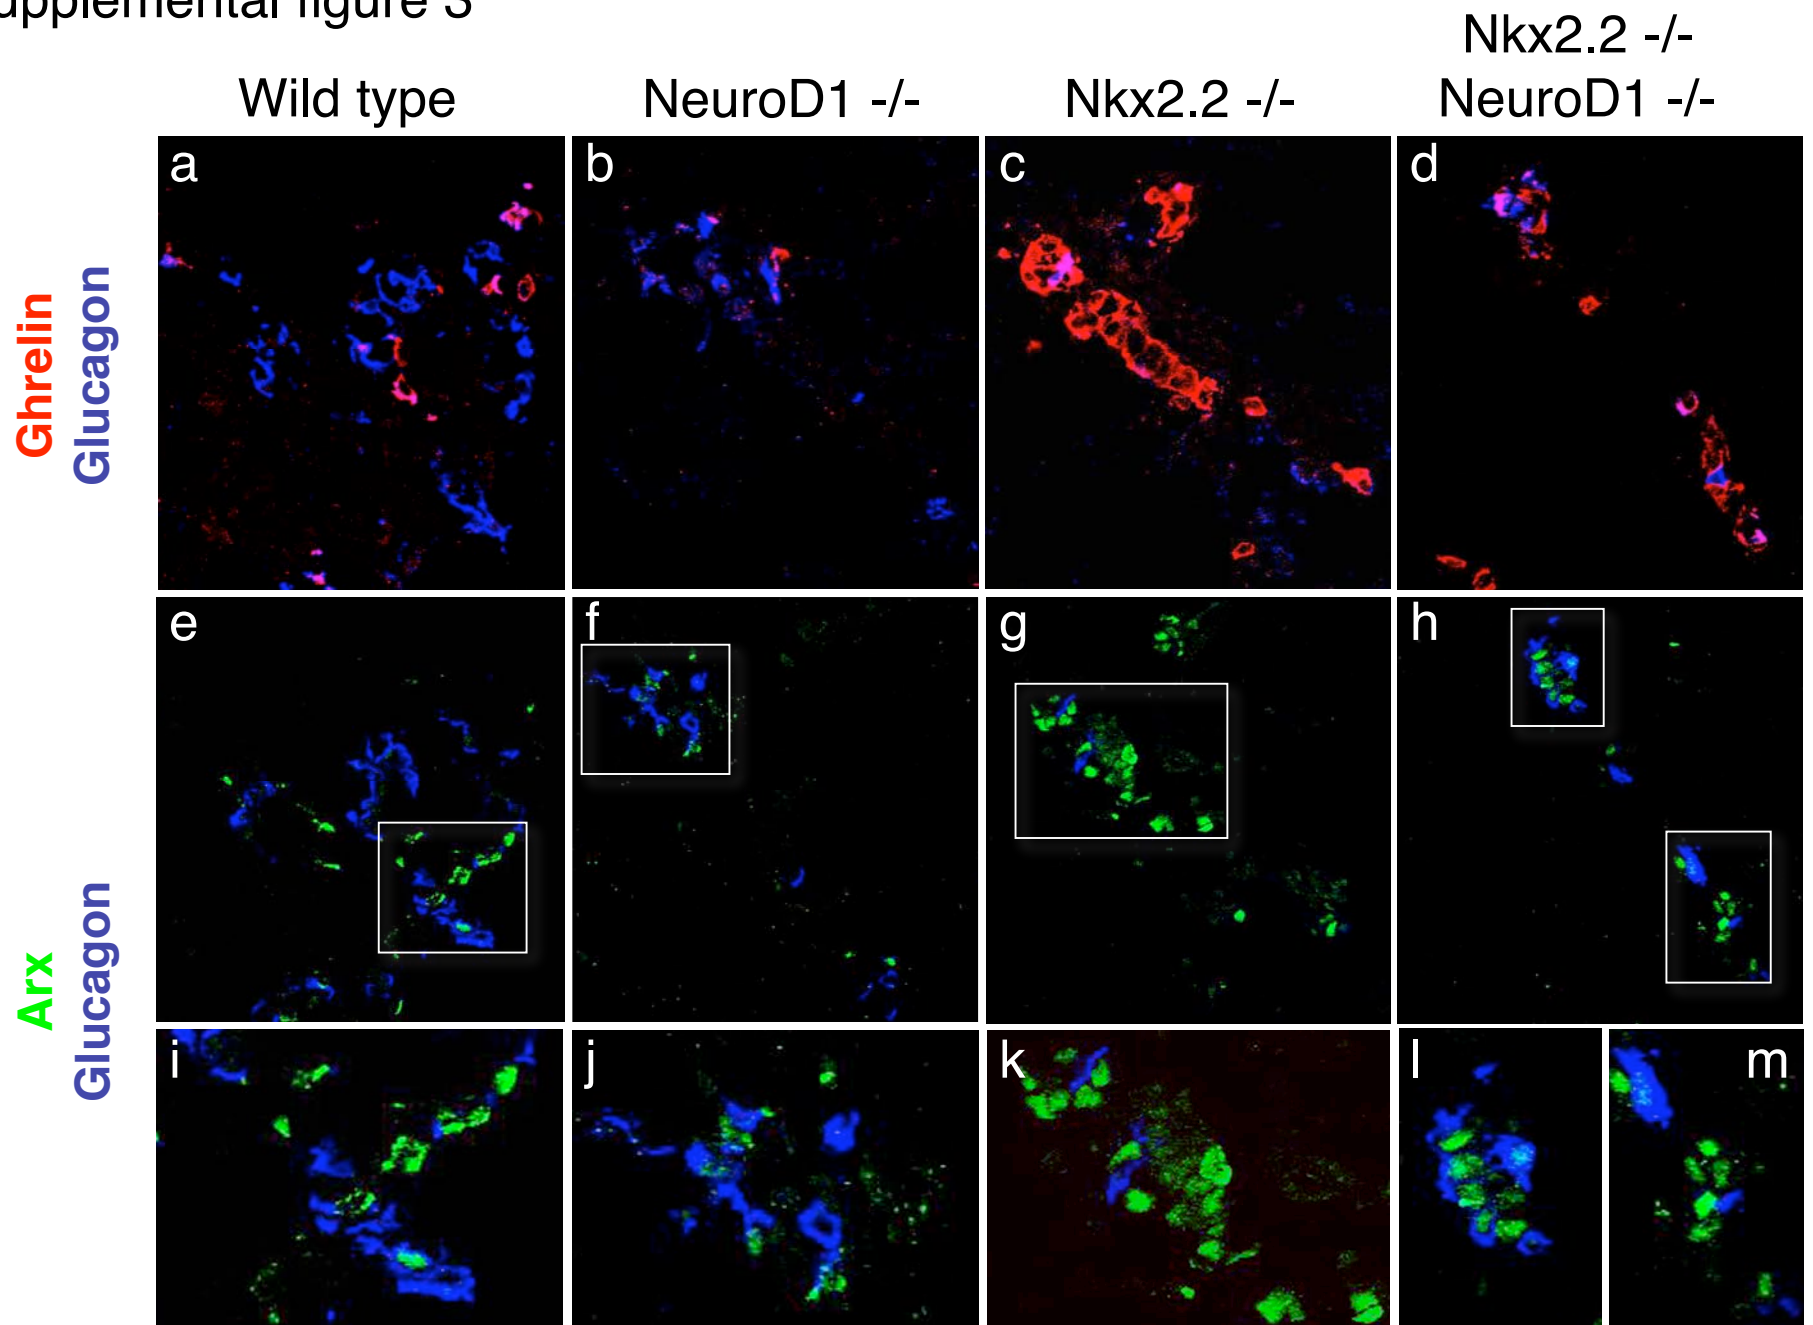

Supplement: NIHMS36072-supplement-03.pdf [file NIHMS36072-supplement-03.pdf]
